# Supplementary material for: Preventing Adipogenesis and Preserving Mitochondria and GLUT-4 Functions by Extracts and Isolated Compounds of Australian Acacia saligna
Source: MDPI journal article supplement (doi:10.3390/molecules28186677), 2023-09-18
Supplement: s1 [file s1]

## Supplementary information

# Preventing adipogenesis and preserving mitochondria and GLUT-4 functions by extracts and isolated compounds of *Acacia saligna*

Anjar P. Asmara<sup>1</sup>, Hui Chen<sup>2</sup>, and Alison T. Ung<sup>1,\*</sup>

<sup>1</sup> School of Mathematical and Physical Sciences, Faculty of Science, University of Technology Sydney, Ultimo, NSW 2007, Australia

<sup>2</sup> School of Life Sciences, Faculty of Science, University of Technology Sydney, Ultimo, NSW 2007, Australia

\* Correspondence: [alison.ung@uts.edu.au](mailto:alison.ung@uts.edu.au)

| Table of contents                                                                                                                                                                                     | Page |
|-------------------------------------------------------------------------------------------------------------------------------------------------------------------------------------------------------|------|
| <b>Experimental procedure:</b> Extraction and compound isolation and identification from the flowers, leaves, and bark of <i>Acacia saligna</i>                                                       | 2    |
| <b>Table S1.</b> Estimated lipid content from adipogenesis assay with ORO staining agent on the 3T3-L1 adipocytes treated with extracts                                                               | 2    |
| <b>Table S2.</b> Estimated lipid content from adipogenesis assay with ORO staining agent on the 3T3-L1 adipocytes treated with isolated compounds within the differentiation process (day-0 to day-8) | 2    |
| <b>Table S3.</b> Estimated expression of GLUT-4 normalised by $\alpha$ -tubulin of the 3T3-L1 adipocytes treated with extracts                                                                        | 3    |
| <b>Figure S1.</b> Original membrane images of Western blot analysis for GLUT-4                                                                                                                        | 3    |
| <b>Figure S2.</b> Original membrane images of Western blot analysis for $\alpha$ -tubulin                                                                                                             | 4    |
| <b>Table S4.</b> Quantitative data of the expression of the target mRNA normalised by $\beta$ -actin from the RT-qPCR of adipocytes treated with MeOH extracts                                        | 5    |
| <b>Table S5.</b> Quantitative data of the expression of the target mRNA normalised by $\beta$ -actin from the RT-qPCR of adipocytes treated with MeOH-isolated compounds                              | 6    |

**1. Experimental procedure:** Extraction and compound isolation and identification from the flowers, leaves, and bark of *Acacia saligna*

Successive solvent extraction with *n*-hexane, dichloromethane (DCM), methanol (MeOH), and water solvent gave twelve different types of extracts of *A. saligna*<sup>28</sup>. Using a bioassay-guided fractionation, eleven compounds were obtained from FL-, LF-, and BK-MeOH extracts through isolation using column chromatography techniques<sup>28</sup>. Spectroscopic methods using FTIR, 1D and 2D NMR, and HRMS suggested the presence of various classes of compounds, including chalcone, flavanone, flavan-3-ol, flavonol, alkyl phenol, cyclitols, and lactone derivatives. Five compounds were isolated from FL-MeOH, including naringenin **1**, naringenin-7-*O*- $\alpha$ -L-arabinofuranoside **2**, isosalipurposide **3**, quercitrin **4**, and *D*-(+)-pinitol **5a**. Flavonoid derivatives, including quercitrin **4**, (-)-epicatechin **6**, and myricitrin **8** were the most isolated compounds found in the LF-MeOH, followed by 2,4-di-*t*-butylphenol **7**, (-)-pinitol **5b**, and (3*S*\*,5*S*\*)-3-hydroxy-5-(2-aminoethyl) dihydrofuran-2(3*H*)-one **9**. Isolated phytochemicals BK-MeOH were (-)-epicatechin **6**, *D*-(+)-pinitol **5a**, and sucrose.

**2. Data of the studies**

**Table S1.** Estimated lipid content during adipogenesis using ORO staining agent on the 3T3-L1 adipocytes treated with extracts.

| No | Sample               | Fold change of adipogenesis (%) |                    |
|----|----------------------|---------------------------------|--------------------|
|    |                      | 12.5 $\mu$ g/mL                 | 50 $\mu$ g/mL      |
| 1  | Vehicle control      | 100 $\pm$ 8.13                  |                    |
| 2  | FL-hex               | 105.1 $\pm$ 10.08               | 90.04 $\pm$ 12.87  |
| 3  | FL-DCM               | 131.3 $\pm$ 8.38                | 112.2 $\pm$ 6.66   |
| 4  | FL-MeOH              | 92.45 $\pm$ 11.17               | 95.36 $\pm$ 10.84  |
| 5  | FL- H <sub>2</sub> O | 83.19 $\pm$ 10.67               | 91.46 $\pm$ 16.75  |
| 6  | LF-hex               | 104.8 $\pm$ 1.46                | 89.82 $\pm$ 2.54   |
| 7  | LF-DCM               | 123 $\pm$ 10.97                 | 140.9 $\pm$ 5.32*  |
| 8  | LF-MeOH              | 84.65 $\pm$ 4.08                | 71.32 $\pm$ 3.77** |
| 9  | LF- H <sub>2</sub> O | 110 $\pm$ 9.52                  | 108.5 $\pm$ 7.98   |
| 10 | BK-hex               | 122.1 $\pm$ 7.01                | 108.3 $\pm$ 1.12   |
| 11 | BK-DCM               | 145.9 $\pm$ 8.56**              | 129.7 $\pm$ 8.21   |
| 12 | BK-MeOH              | 130.4 $\pm$ 4.94**              | 88.1 $\pm$ 4.73    |
| 13 | BK-H <sub>2</sub> O  | 99.56 $\pm$ 4.16                | 95.95 $\pm$ 6.30   |
| 14 | NAC 5 mM             | 77.86 $\pm$ 5.77                |                    |
| 15 | NAC 10 mM            | 70.45 $\pm$ 5.45*               |                    |

Data in mean  $\pm$  SEM; \**p* = 0.02 of LF-DCM 50  $\mu$ g/mL and NAC 10  $\mu$ M; \*\**p* = 0.006 of BK-DCM 12.5  $\mu$ g/mL and BK-MeOH 12.5  $\mu$ g/mL; \*\**p* = 0.009 of LF-MeOH 50  $\mu$ g/mL, *vs* vehicle control (*n* = 3, one-way ANOVA, Tukey's post hoc tests).

**Table S2.** Estimated lipid content during adipogenesis using ORO staining agent on the 3T3-L1 adipocytes treated with isolated compounds within the differentiation process (day-0 to day-8)

| No | Sample                                                         | Fold change of adipogenesis (%) |                   |
|----|----------------------------------------------------------------|---------------------------------|-------------------|
|    |                                                                | 0.5 $\mu$ M                     | 10 $\mu$ M        |
| 1  | Vehicle control                                                | 100 $\pm$ 0.81                  |                   |
| 2  | Naringenin <b>1</b>                                            | 90.69 $\pm$ 2.41                | 85.59 $\pm$ 1.77  |
| 3  | Naringenin-7 <i>O</i> - $\alpha$ -L-arabinofuranoside <b>2</b> | 92.41 $\pm$ 4.34                | 92.16 $\pm$ 5.98  |
| 4  | Isosalipurposide <b>3</b>                                      | 97.18 $\pm$ 8.43                | 100.5 $\pm$ 13.98 |
| 5  | Quercitrin <b>4</b>                                            | 94.1 $\pm$ 4.59                 | 88.12 $\pm$ 5.32  |
| 6  | <i>D</i> -(+)-pinitol <b>5a</b>                                | 92.38 $\pm$ 8.41                | 89.12 $\pm$ 5.64  |
| 7  | (-)-Pinitol <b>5b</b>                                          | 94.99 $\pm$ 5.72                | 83.08 $\pm$ 1.58  |
| 8  | (-)-Epicatechin <b>6</b>                                       | 87.85 $\pm$ 8.40                | 78.85 $\pm$ 5.68  |

| No | Sample                                                       | Fold change of adipogenesis (%) |                   |
|----|--------------------------------------------------------------|---------------------------------|-------------------|
|    |                                                              | 0.5 $\mu$ M                     | 10 $\mu$ M        |
| 9  | 2,4-Di- <i>t</i> -butylphenol 7                              | 96.27 $\pm$ 3.76                | 90.14 $\pm$ 3.85  |
| 10 | Myricitrin 8                                                 | 96.55 $\pm$ 2.78                | 74.72 $\pm$ 3.67* |
| 11 | 3-Hydroxy-5-(2-aminoethyl) dihydrofuran-2(3 <i>H</i> )-one 9 | 84.12 $\pm$ 7.54                | 80.87 $\pm$ 5.62  |
| 12 | NAC 5 mM                                                     | 57.69 $\pm$ 1.16****            |                   |
| 13 | NAC 10 mM                                                    | 48.87 $\pm$ 2.86****            |                   |
| 14 | Undifferentiated                                             | 57.70 $\pm$ 0.25****            |                   |

Data in mean  $\pm$  SEM; \* $p$  = 0.03 of compound 8 10  $\mu$ M; \*\*\*\* $p$  = 0.00008 of undifferentiated group and NAC, *vs* vehicle control ( $n$  = 3, one-way ANOVA, Tukey's post hoc tests).

**Table S3.** GLUT-4 level normalised by  $\alpha$ -tubulin in 3T3-L1 adipocytes treated with extracts.

| No | Sample               | GLUT-4 expression (%) |                       |
|----|----------------------|-----------------------|-----------------------|
|    |                      | 12.5 $\mu$ g/mL       | 50 $\mu$ g/mL         |
| 1  | Vehicle control      | 39.7 $\pm$ 4.67       |                       |
| 2  | Metformin 10 $\mu$ M | 91.82 $\pm$ 25.6      |                       |
| 3  | FL-MeOH              | 86.46 $\pm$ 3.21      | 101.6 $\pm$ 7.00<br>* |
| 4  | LF-MeOH              | 76.97 $\pm$ 11.93     | 90.1 $\pm$ 0.34       |
| 5  | BK-MeOH              | 58.54 $\pm$ 4.56      | 67.9 $\pm$ 3.91       |

Data in mean  $\pm$  SEM; \* $p$  = 0.042 of FL-MeOH 50  $\mu$ g/mL, *vs* vehicle control ( $n$  = 2, one-way ANOVA, Tukey's post hoc tests).

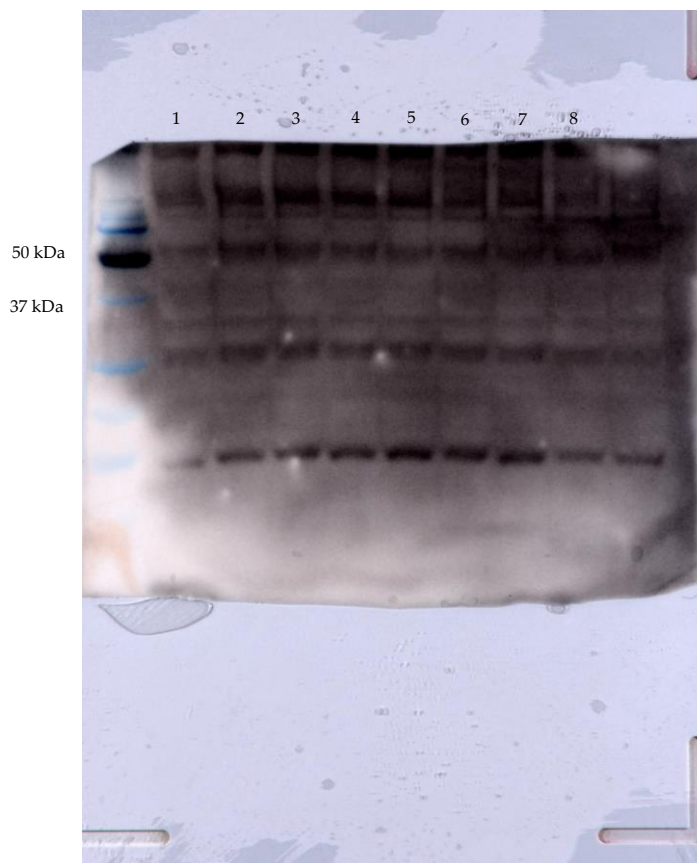

**Figure S1.** Original membrane images of Western blot analysis of GLUT-4 (lane 1 = vehicle control, 2 = metformin 10  $\mu$ M, 3 = FL-MeOH 12.5  $\mu$ g/mL, 4 = FL-MeOH 50  $\mu$ g/mL, 5 = LF-MeOH 12.5  $\mu$ g/mL, 6 = LF-MeOH 50  $\mu$ g/mL, 7 = BK-MeOH 12.5  $\mu$ g/mL, and 8 = BK-MeOH 50  $\mu$ g/mL)

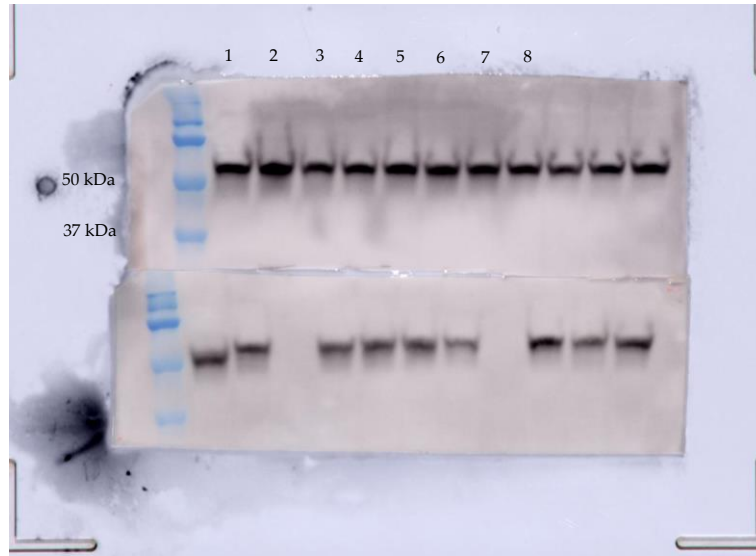

**Figure S2.** Original membrane images of Western blot analysis of  $\alpha$ -tubulin (lane 1 = vehicle control, 2 = metformin 10  $\mu$ M, 3 = FL-MeOH 12.5  $\mu$ g/mL, 4 = FL-MeOH 50  $\mu$ g/mL, 5 = LF-MeOH 12.5  $\mu$ g/mL, 6 = LF-MeOH 50  $\mu$ g/mL, 7 = BK-MeOH 12.5  $\mu$ g/mL, and 8 = BK-MeOH 50  $\mu$ g/mL).

**Table S4.** mRNA expression of target genes normalised by  $\beta$ -actin in adipocytes treated with MeOH extracts

| Treatment       | Concentration   | mRNAs related to mitochondrial biogenesis |                    |                    | Inflammatory markers' mRNAs |                   |
|-----------------|-----------------|-------------------------------------------|--------------------|--------------------|-----------------------------|-------------------|
|                 |                 | Adiponectin                               | PGC-1 $\alpha$     | mtTFA              | TNF- $\alpha$               | IL-6              |
| Vehicle control | -               | 95.98 $\pm$ 2.08                          | 125.4 $\pm$ 2.50   | 125.7 $\pm$ 0.08   | 175.5 $\pm$ 2.81            | 152.6 $\pm$ 1.65  |
| Metformin       | 10 $\mu$ M      | 98.15 $\pm$ 1.67                          | 127.1 $\pm$ 1.9    | 129.4 $\pm$ 1.63   | 172.2 $\pm$ 0.23            | 148.2 $\pm$ 0.83  |
| FL-MeOH         | 12.5 $\mu$ g/mL | 102.6 $\pm$ 1.00                          | 129.7 $\pm$ 2.76   | 127.4 $\pm$ 3.58   | 179.3 $\pm$ 4.87            | 151.5 $\pm$ 3.25  |
|                 | 50 $\mu$ g/mL   | 124.9 $\pm$ 11.87*                        | 136.8 $\pm$ 2.91*  | 137.2 $\pm$ 0.81** | 159.6 $\pm$ 9.72            | 142.1 $\pm$ 3.19* |
| LF-MeOH         | 12.5 $\mu$ g/mL | 99.94 $\pm$ 1.68                          | 134.1 $\pm$ 1.85   | 128.4 $\pm$ 4.16   | 174.7 $\pm$ 4.39            | 151.9 $\pm$ 5.10  |
|                 | 50 $\mu$ g/mL   | 106.1 $\pm$ 2.72                          | 138.8 $\pm$ 0.36** | 134.4 $\pm$ 1.53   | 163.9 $\pm$ 7.75            | 142.2 $\pm$ 10.89 |
| BK-MeOH         | 12.5 $\mu$ g/mL | 102.8 $\pm$ 4.94                          | 135.3 $\pm$ 0.69*  | 136.4 $\pm$ 1.69*  | 180.3 $\pm$ 3.35            | 156.9 $\pm$ 0.45  |
|                 | 50 $\mu$ g/mL   | 113.8 $\pm$ 12.33                         | 136.1 $\pm$ 2.71*  | 138.3 $\pm$ 1.47** | 163.5 $\pm$ 1.56            | 153.4 $\pm$ 1.22  |

Data in mean  $\pm$  SEM; \* $p$  = 0.01 of FL-MeOH and BK-MeOH 50  $\mu$ g/mL in PGC-1 $\alpha$  experiment and BK-MeOH 12.5  $\mu$ g/mL in mtTFA experiment; \* $p$  = 0.02 of FL-MeOH in adiponectin experiment; \* $p$  = 0.03 of BK-MeOH 12.5  $\mu$ g/mL in PGC-1 $\alpha$  experiment; \*\* $p$  = 0.002 of LF-MeOH in PGC-1 $\alpha$  experiment; \*\* $p$  = 0.003 of BK-MeOH 50  $\mu$ g/mL in mtTFA experiment; \*\* $p$  = 0.006 of FL-MeOH in mtTFA experiment, *vs* vehicle control ( $n$  = 3, one-way ANOVA, Tukey's post hoc tests).

**Table S5.** mRNA expression of target genes normalised by  $\beta$ -actin in adipocytes treated with MeOH isolated compounds

| Treatment                                             | Concentration ( $\mu$ M) | mRNAs related to mitochondrial biogenesis |                    |                  | Inflammatory markers' mRNAs |                  |
|-------------------------------------------------------|--------------------------|-------------------------------------------|--------------------|------------------|-----------------------------|------------------|
|                                                       |                          | Adiponectin                               | PGC-1 $\alpha$     | mtTFA            | TNF- $\alpha$               | IL-6             |
| Vehicle control                                       | -                        | 95.98 $\pm$ 2.08                          | 125.4 $\pm$ 2.5    | 125.7 $\pm$ 0.08 | 175.5 $\pm$ 2.81            | 152.6 $\pm$ 1.65 |
| Metformin                                             | 10                       | 98.15 $\pm$ 1.67                          | 127.1 $\pm$ 1.9    | 129.4 $\pm$ 1.63 | 172.2 $\pm$ 0.23            | 148.2 $\pm$ 0.83 |
| Naringenin <b>1</b>                                   | 0.5                      | 97.07 $\pm$ 1.97                          | 125.8 $\pm$ 1.52   | 126.9 $\pm$ 1.72 | 170.6 $\pm$ 6.91            | 151.6 $\pm$ 3.16 |
|                                                       | 10                       | 110.4 $\pm$ 12.19*                        | 131.6 $\pm$ 2.33   | 132.1 $\pm$ 0.73 | 164.5 $\pm$ 7.90            | 148.7 $\pm$ 3.03 |
| Naringenin-7O- $\alpha$ -L-arabinofuranoside <b>2</b> | 0.5                      | 96.93 $\pm$ 2.52                          | 127 $\pm$ 1.71     | 129.1 $\pm$ 3.44 | 176.6 $\pm$ 1.14            | 152 $\pm$ 2.56   |
|                                                       | 10                       | 103.2 $\pm$ 2.56                          | 132.4 $\pm$ 2.86   | 133.3 $\pm$ 2.96 | 161.3 $\pm$ 5.45*           | 151.1 $\pm$ 2.52 |
| Isosalipurposide <b>3</b>                             | 0.5                      | 95.85 $\pm$ 0.55                          | 127.3 $\pm$ 2.46   | 130 $\pm$ 1.69   | 168.4 $\pm$ 2.88            | 152.3 $\pm$ 3.95 |
|                                                       | 10                       | 97.8 $\pm$ 1.14                           | 128.4 $\pm$ 2.54   | 131.4 $\pm$ 1.61 | 165.9 $\pm$ 3.54            | 151.7 $\pm$ 3.22 |
| Quercitrin <b>4</b>                                   | 0.5                      | 95.38 $\pm$ 1.30                          | 127.1 $\pm$ 3.45   | 128 $\pm$ 0.85   | 169.2 $\pm$ 4.88            | 152.9 $\pm$ 4.52 |
|                                                       | 10                       | 97.38 $\pm$ 0.54                          | 130.4 $\pm$ 2.52   | 131.4 $\pm$ 2.55 | 162.8 $\pm$ 6.23            | 146.1 $\pm$ 1.68 |
| <i>D</i> -(+)-Pinitol <b>5a</b>                       | 0.5                      | 95.4 $\pm$ 2.59                           | 130.4 $\pm$ 1.51   | 128.8 $\pm$ 1.04 | 166.7 $\pm$ 2.32            | 151.4 $\pm$ 2.98 |
|                                                       | 10                       | 97.49 $\pm$ 1.83                          | 137.5 $\pm$ 2.89** | 130.2 $\pm$ 1.73 | 155.9 $\pm$ 6.45*           | 147.9 $\pm$ 3.29 |
| (-)-Pinitol <b>5b</b>                                 | 0.5                      | 94.24 $\pm$ 3.10                          | 126.6 $\pm$ 0.71   | 128 $\pm$ 3.84   | 169 $\pm$ 10.08             | 148.5 $\pm$ 5.62 |
|                                                       | 10                       | 95.41 $\pm$ 3.66                          | 127.4 $\pm$ 1.24   | 130.3 $\pm$ 5.79 | 163 $\pm$ 10.05             | 146.5 $\pm$ 4.17 |
| (-)-Epicatechin <b>6</b>                              | 0.5                      | 95.42 $\pm$ 0.52                          | 126.9 $\pm$ 2.46   | 126.8 $\pm$ 0.93 | 172.3 $\pm$ 6.54            | 150.1 $\pm$ 3.41 |
|                                                       | 10                       | 95.92 $\pm$ 1.03                          | 128.5 $\pm$ 2.25   | 129 $\pm$ 2.10   | 168.4 $\pm$ 5.74            | 148.1 $\pm$ 1.79 |
| Myricitrin <b>8</b>                                   | 0.5                      | 96.18 $\pm$ 0.69                          | 126.2 $\pm$ 1.59   | 130.2 $\pm$ 2.25 | 170.9 $\pm$ 6.85            | 155.4 $\pm$ 3.44 |
|                                                       | 10                       | 98.52 $\pm$ 0.70                          | 134.1 $\pm$ 1.02   | 131.8 $\pm$ 0.72 | 165.6 $\pm$ 5.68            | 145.6 $\pm$ 9.24 |

Data in mean  $\pm$  SEM; \* $p$  = 0.02 of compound **1** 10  $\mu$ M in adiponectin experiment and compound **5a** 10  $\mu$ M in TNF- $\alpha$  experiment; \* $p$  = 0.04 of compound **2** 10  $\mu$ M in TNF- $\alpha$  experiment; \*\* $p$  = 0.002 of compound **5a** 10  $\mu$ M in PGC-1 $\alpha$  experiment, *vs* vehicle control ( $n$  = 3, one-way ANOVA, Tukey's post hoc tests).
